# Supplementary material
Source: PubMed Central journal article supplement (PMC2597527)
Supplement: NIHMS62045-supplement-si20061203_051.pdf [file NIHMS62045-supplement-si20061203_051.pdf]

# **Role of zinc content and the catalytic efficiency of B1 metallo $\beta$ -lactamases**

Matteo Dal Peraro,<sup>†\*</sup> Alejandro J. Vila,<sup>§</sup> Paolo Carloni<sup>‡</sup> and Michael L. Klein<sup>†</sup>

<sup>†</sup>Center for Molecular Modeling, University of Pennsylvania, 231 S. 34<sup>th</sup> Street, Philadelphia, PA 19104, USA

<sup>‡</sup>International School for Advanced Studies, SISSA-ISAS, via Beirut 4, Trieste, Italy

<sup>§</sup>Molecular Biology Division, IBR, CONICET, and Biophysics Section, Universidad Nacional de Rosario, Suipacha 531, S2002LRK Rosario, Argentina

## **SUPPLEMENTARY INFORMATION**

\*To whom correspondence should be addressed:

matteodp@cmm.upenn.edu, phone: 1-215-898-9347, fax: 1-215-573-6233

## MD structural analysis of CcrA adducts and comparison with BclI adducts<sup>50</sup>

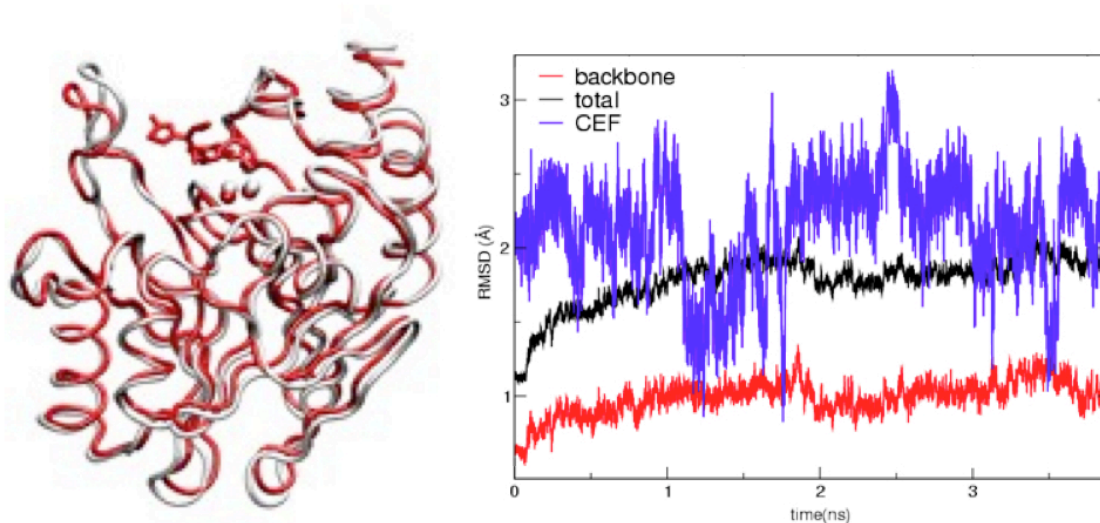

**Figure 1SI. CcrA-CEF RMSD.** **Left.** Superposition of the X-ray 1znb structure (in gray) and the MD average structure of CcrA-CEF (in red). **Right.** RMSD of CcrA relative to initial X-ray structure is plotted vs. time. The RMSD of CEF substrate is also reported in blue.

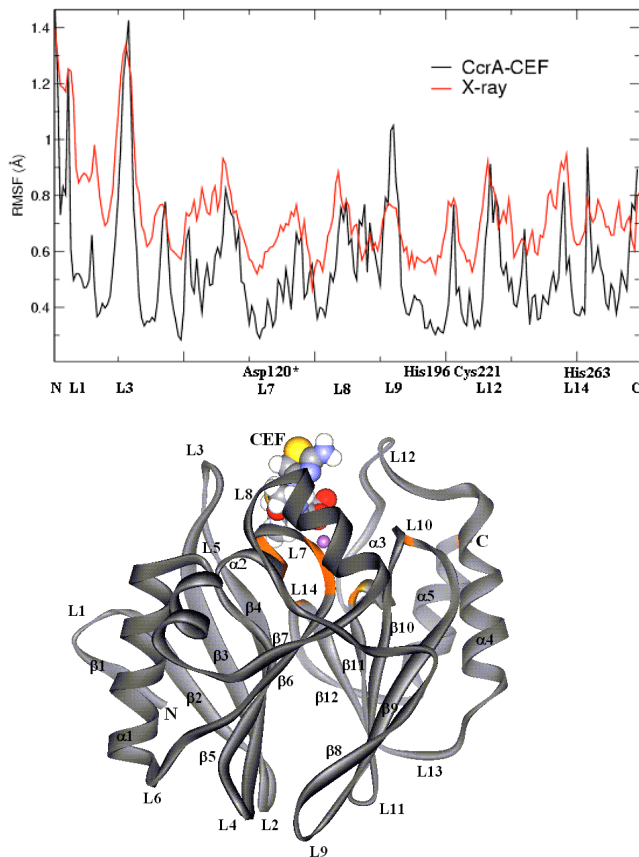

**Figure 2SI. CcrA-CEF RMSFs.** The calculated and experimentally derived RMS fluctuations per residue are compared for CcrA X-ray and MD structure. Relevant residues and loops are indicated in abscissa (Asp120\* stands for His116, His118, Asp120 and Arg121 residues motif, labels are reported in the CcrA cartoon at the bottom).

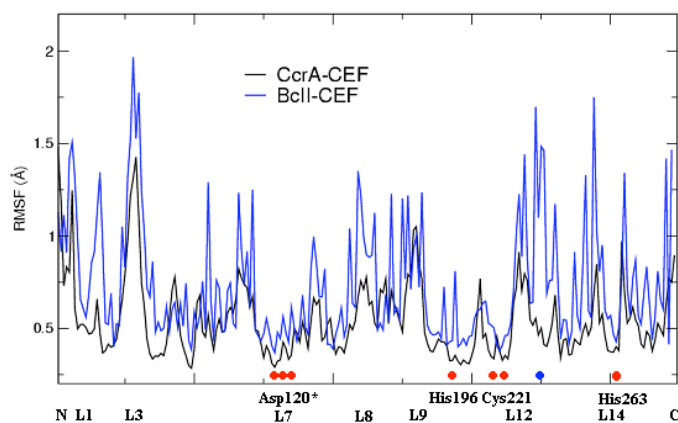

**Figure 3SI. RMSFs CcrA-CEF vs. BcII-CEF.** The calculated RMS fluctuations per residue of CcrA-CEF model are compared with those of the monozinc MD BcII-CEF structure (50). Relevant residues and loops are indicated in abscissa (Asp120\* stands for His116, His118, Asp120 and Arg121 residues). Red dots indicated zinc ligands, whereas blue dot L12, and Asn233 residue in particular.

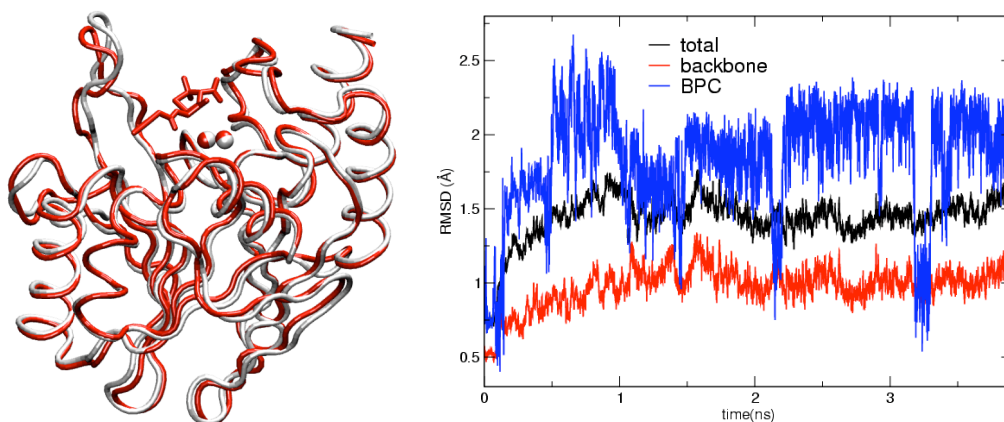

**Figure 4SI. CcrA-BPC RMSD.** **Left.** Superposition of the X-ray structure (in gray) and the MD average structure of CcrA-BPC (in red). **Right.** RMSD of CcrA relative to initial X-ray structure is plotted vs. time. The RMSD of BPC substrate is also reported in blue relative to its docked initial position.

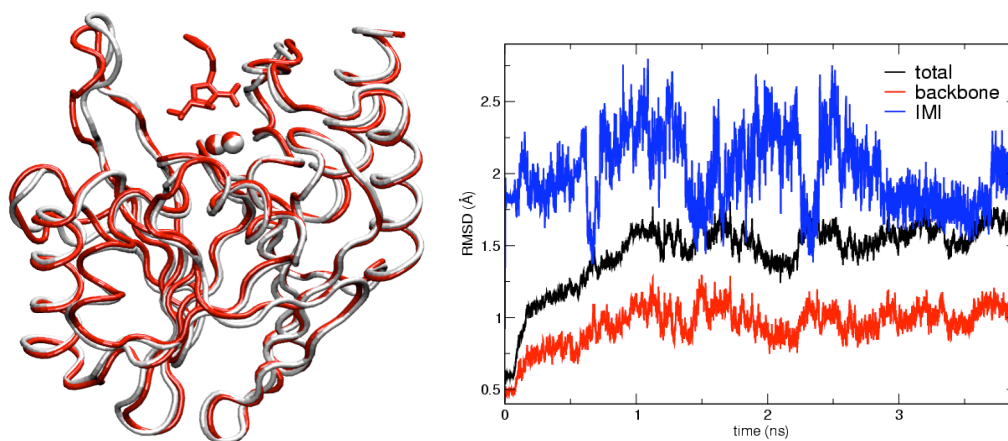

**Figure 5SI. CcrA-IMI RMSD.** **Left.** Superposition of the X-ray structure (in gray) and the MD average structure of CcrA-IMI (in red). **Right.** RMSD of CcrA relative to initial X-ray structure is plotted vs. time. The RMSD of IMI substrate is also reported in blue relative to its docked initial position.

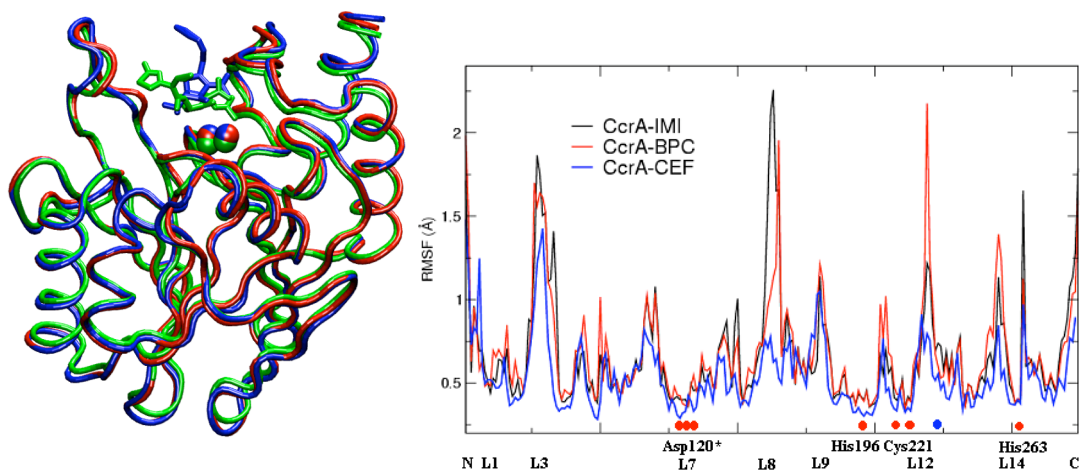

**Figure 6SI.** **Left.** Superposition of the MD-average structures (CcrA-CEF in green, CcrA-BPC in red, CcrA-IMI in blue). **Right.** RMSF's of CcrA MD adducts. Relevant residues and loops are indicated in abscissa (Asp120\* stands for His116, His118, Asp120 and Arg121 residues, ref. 50).

## CcrA-CEF adduct

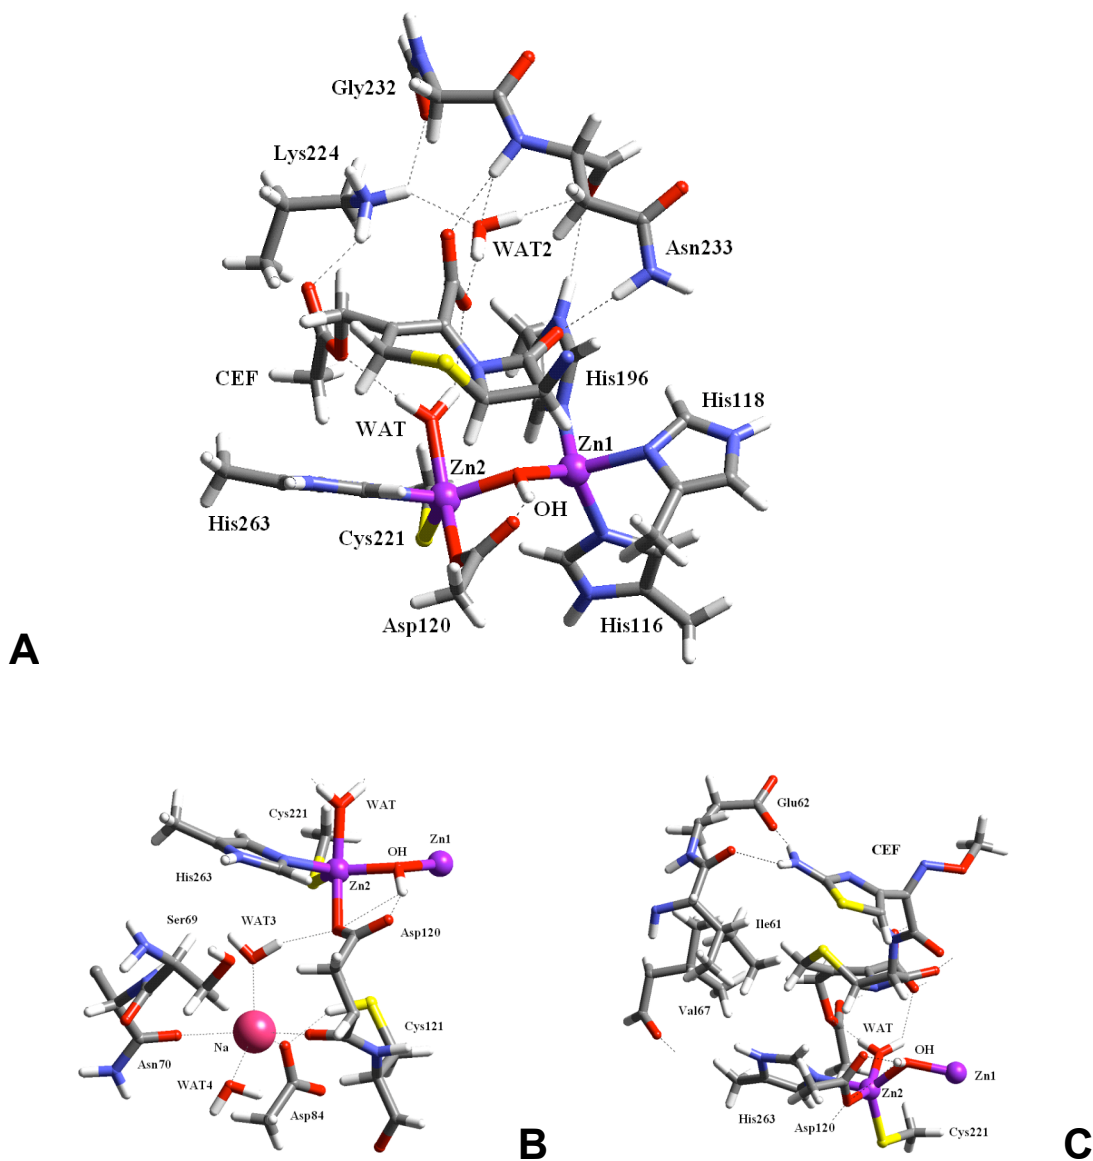

**Figure 7SI. A-C CcrA-CEF active site H-bonds network. A.** CEF binding mode. **B.** Na<sup>+</sup> ion solvation shell near Asp120 residue. Atoms are represented in ball-and-sticks, zinc and sodium ions as purple, and pink spheres. H-bond interactions are indicated in dashed lines. **C.** CEF interactions on loop L3.

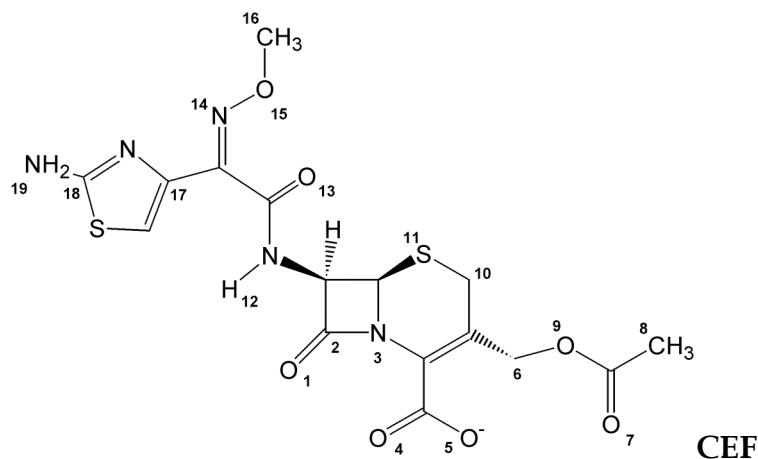

**Scheme 1SI.** Chemical structures of cefotaxime (CEF) (labels as used in the following tables).

| H-bonds                     | X...H-Y  | %   |
|-----------------------------|----------|-----|
| Oδ1@Asp120 ... H-O@OH       | 2.63(9)  | 100 |
| Oδ1@Asp120 ... H-N@Asp120   | 2.86(9)  | 55  |
| Oδ2@Asp120 ... H-O@WAT3     | 2.89(16) | 97  |
| O@His118 ... H-N@Cys121     | 2.93(12) | 100 |
| O@His118 ... H-N@Ile122     | 3.02(15) | 99  |
| Oδ1@Asn79 ... H-Nδ1@His116  | 2.82(11) | 100 |
| Oδ1@Asp236 ... H-Ne2@His118 | 2.89(14) | 91  |
| Oδ2@Asp236 ... H-Ne2@His118 | 3.14(19) | 61  |
| O@Asn233... H-Nδ1@His196    | 3.04(19) | 87  |
| Oδ1@Asn233... H-Oγ@Ser235   | 2.77(16) | 61  |
| Oδ1@Asn233... H-N@Ser235    | 3.13(17) | 89  |
| O@Pro34 ... H-Nδ2@His263    | 2.79(11) | 100 |
| Oδ2@Asp50... H-S@Cys221     | 3.24(13) | 65  |
| O1@CEF ... H-Nδ2@Asn233     | 2.98(16) | 90  |
| O4@CEF ... H-N@Asn233       | 3.22(20) | 15  |
| O4@CEF ... H-WAT            | 2.96(21) | 80  |
| O4@CEF ... H-WAT2           | 2.72(12) | 87  |
| O5@CEF ... H-N@Asn233       | 2.97(16) | 96  |
| O5@CEF ... H-WAT2           | 3.28(16) | 25  |
| O7@CEF ... H-Nζ@Lys224      | 2.83(13) | 93  |
| O8@CEF ... H-WAT            | 2.93(17) | 91  |
| WAT2 ... H-Nζ@Lys224        | 2.91(15) | 90  |
| O@Asn233 ... H-WAT2         | 3.02(22) | 66  |
| Oδ2@Asp234 ... H-O@wat      | 2.68(12) | 100 |
| Oδ1@Asp234 ... H-O@wat      | 2.69(13) | 95  |
| Oδ2@Asp84 ... H-S@Cys121    | 3.24(13) | 65  |
| O@Ile61 ... H-N19@CEF       | 2.98(18) | 61  |
| Oε1@Glu62 ... H-N19@CEF     | 2.97(20) | 34  |
| Oε2@Glu62 ... H-N19@CEF     | 2.96(19) | 52  |

**Table 1SI.** Selected active site H-bond interactions. Distances are in Å, see Figure 7SI

| CEF distances    | X@CEF...CcrA |
|------------------|--------------|
| O1 ... Zn1       | 4.13(36)     |
| C2 ... O@OH      | 3.41(25)     |
| N3 ... Zn2       | 3.80(18)     |
| Na ... O@Asn70   | 2.42(11)     |
| Na ... O@Asp120  | 2.43(13)     |
| Na ... Oδ2@Asp84 | 2.35(10)     |
| Na ... H@Cys121  | 3.71(49)     |
| Na ... WAT3      | 2.47(15)     |
| Na ... WAT4      | 2.37(9)      |
| S ... Cγ2@Val67  | 6.06(98)     |
| S ... Cδ@Ile61   | 4.18(45)     |

Table 2SI. CEF principal contacts. Distances are in Å, see Figure 7SI

## CcrA-BPC adduct

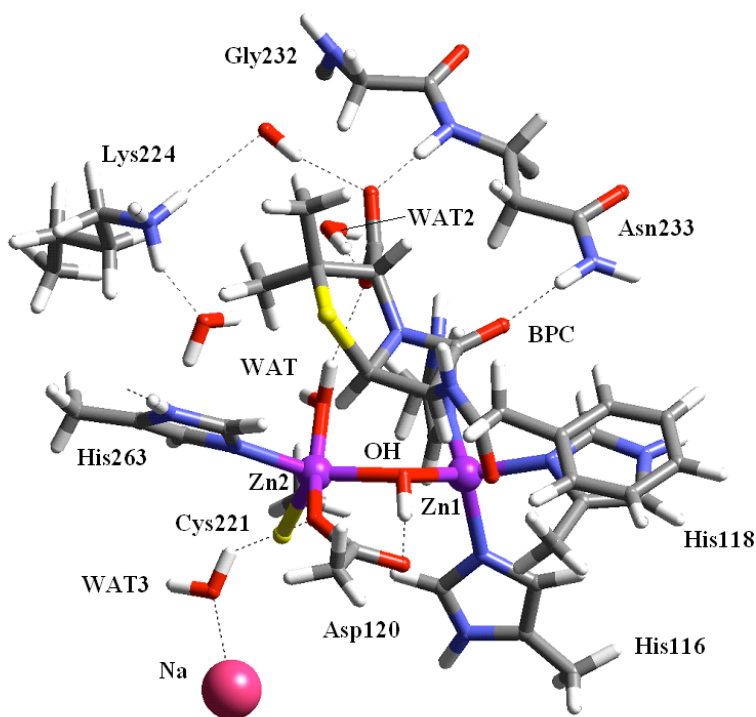



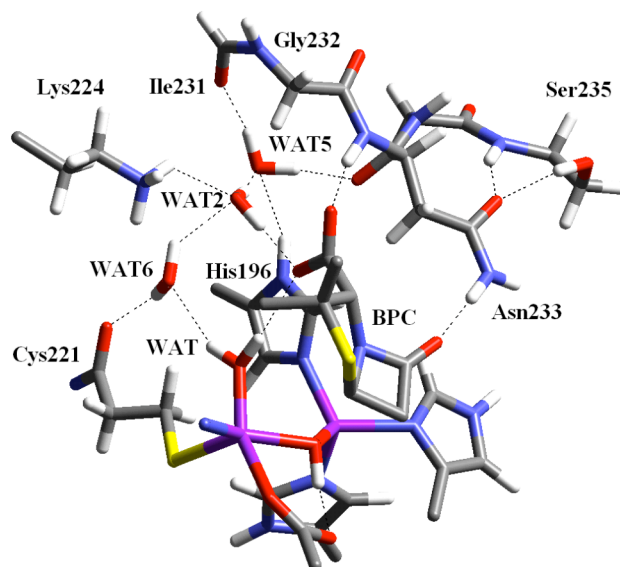

**Figure 8SI.** CcrA-BPC active site H-bonds network. BPC binding mode, atoms are represented in ball-and-sticks, zinc and sodium ions as purple, and pink spheres. H-bond interactions are indicated in dashed lines.

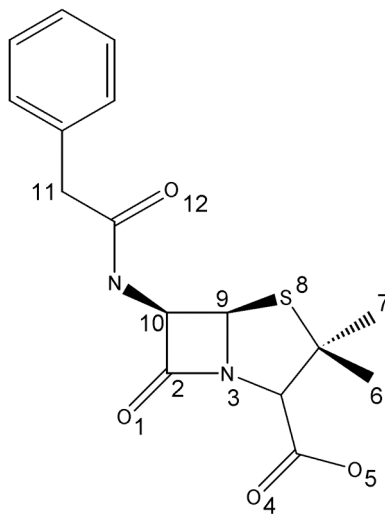

**Scheme 2SI.** Chemical structures of benzylpenicillin (BPC) (labels as used in the following tables).

| BPC distances              | X@BPC...CcrA        |
|----------------------------|---------------------|
| O1 ... Zn1                 | 4.50(40)            |
| C2 ... O@OH                | 3.47(20)            |
| N3 ... Zn2                 | 4.24(18)            |
| Zn2-WAT                    | 2.00(10)            |
| Na ... O@Asn36             | 2.44(13)            |
| Na ... O@Asp120            | 2.49(19)            |
| Na... Od2@Asp50            | 2.34(10)            |
| Na ... WAT3                | 2.48(16)            |
| Na ... WAT4                | 2.38(10)            |
| O4 ... N $\zeta$ @Lys224   | 5.28(34)            |
| C6 ... C $\gamma$ 2@Val67  | 4.95(47)            |
| C7 ... C $\gamma$ 1@Val67  | 4.26(34)            |
| C6 ... C $\gamma$ 2@Val67  | 4.54(39)            |
| Ring... C $\delta$ 1@Leu61 | 5.24(76) min 4.3(5) |
| Ring... C $\gamma$ 2@Leu87 | 5.45(71)            |

**Table 3SI.** Selected active site H-bond interactions. Distances are in Å, see Figure 8SI

| CcrA-BPC H-bonds                   | X...H-Y  | %   |
|------------------------------------|----------|-----|
| O $\delta$ 1@Asp120 ... H-O@OH     | 2.62(10) | 100 |
| O $\delta$ 1@Asp120 ... H-N@Asp120 | 2.11(18) | 57  |
| O $\delta$ 2@Asp120 ... H-O@WAT3   | 2.90(18) | 90  |
| O1@CEF ... H-N $\delta$ 2@Asn233   | 2.78(15) | 85  |
| O5@CEF ... H-N@Asn233              | 2.87(15) | 97  |
| O4@CEF ... H-N@Asn233              | 3.32(20) | 19  |
| O4@CEF ... H-O@WAT                 | 2.73(16) | 99  |
| O4@CEF ... H-O@WAT2*(4)            | 2.71(13) | 96  |
| O@WAT2* ... H-N $\zeta$ @Lys224    | 2.81(15) | 83  |
| O@Asn233 ... H-O@WAT5              | 2.76(30) | 91  |
| O@WAT5... H-N $\delta$ @His196     | 2.95(21) | 95  |

**Table 4SI.** BPC principal contacts. Distances are in Å, see also Figure 8SI

## CcrA-IMI adduct

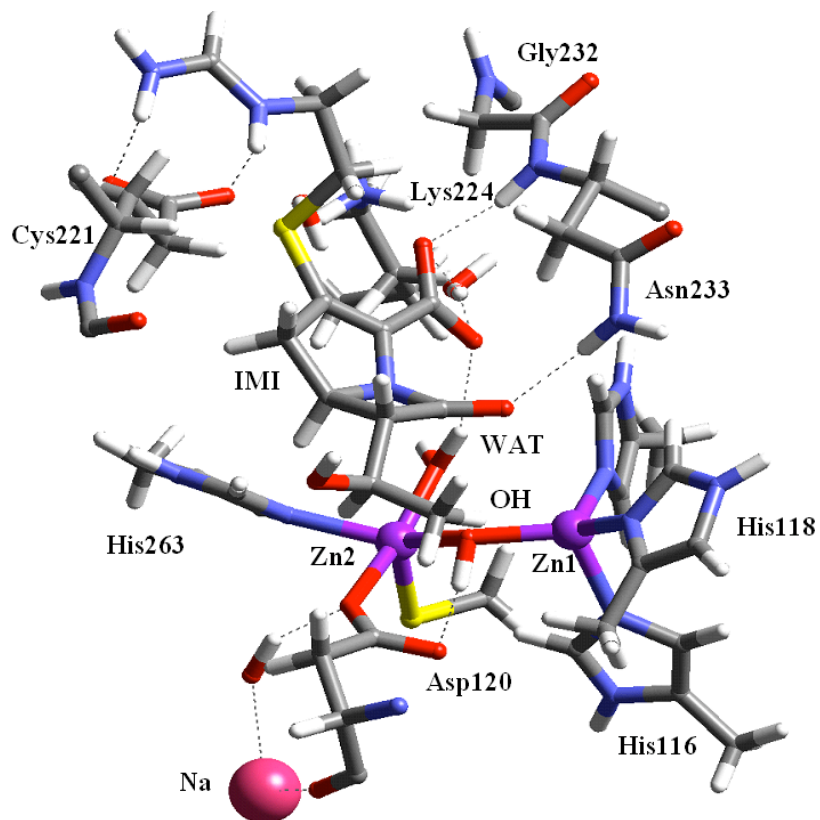

**Figure 9SI.** CcrA-IMI active site H-bonds network. IMI binding mode, atoms are represented in ball-and-sticks, zinc and sodium ions as purple, and pink spheres. H-bond interactions are indicated in dashed lines.

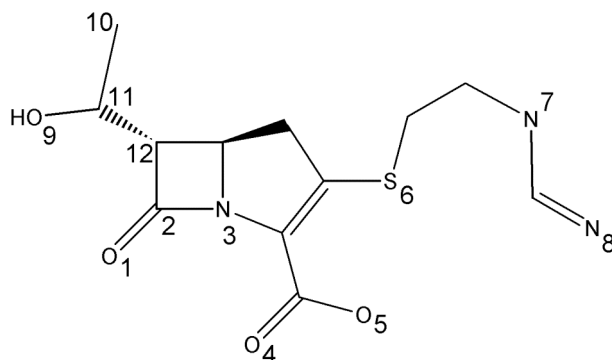

**Scheme 1SI.** Chemical structures of imipenem (IMI) (labels as used in the following tables).

| <b>CcrA-IMI H-bonds</b>   | <b>X...H-Y</b> | <b>%</b> |
|---------------------------|----------------|----------|
| Oδ1@Asp120 ... H-O@OH     | 2.63(9)        | 100      |
| Oδ1@Asp120 ... H-N@Asp120 | 2.91(18)       | 96       |
| Oδ2@Asp120 ... H-O@WAT3   | 2.93(19)       | 89       |
| O1@CEF ... H-Nδ2@Asn233   | 2.94(29)       | 80       |
| O5@CEF ... H-N@Asn233     | 2.94(22)       | 96       |
| O4@CEF ... H-O@WAT        | 2.77(17)       | 99       |
| O4@CEF ... H-O@WAT2       | 2.78(17)       | 97       |
| O@WAT2 ... H-Nz@Lys224    | 3.05(29)       | 72       |
| O@Asn233 ... H-O@WAT5     | 2.68(11)       | 99       |
| O@WAT5 ... H-Nd@His196    | 2.98(20)       | 94       |
| O@WAT5 ... H-O@WAT2       | 2.78(18)       | 95       |
| O@WAT2 ... H-O@WAT6       | 2.81(17)       | 89       |
| O@Cys221 ... H-O@WAT6     | 2.80(22)       | 92       |
| O@WAT6 ... H-O@WAT        | 2.98(28)       | 66       |
| Oε2@Glu62 ... H-N31       | 2.72(16)       | 86       |
| Oε1@Glu62 ... H-N35       | 2.76(16)       | 87       |

**Table 5SI.** Selected active site H-bond interactions. Distances are in Å, see Figure 9SI

| <b>IMI distances</b> | <b>X@IMI...BcII</b> |
|----------------------|---------------------|
| O1 ... Zn1           | 3.68(29)            |
| C2 ... O@OH          | 3.20(17)            |
| N3 ... Zn2           | 3.88(18)            |
| Zn2 ... WAT          | 1.98(9)             |
| Na ... O@Asn36       | 2.42(12)            |
| Na ... O@Asp120      | 2.49(19)            |
| Na ... Oδ2@Asp50     | 2.34(10)            |
| Na ... WAT3          | 2.46(17)            |
| Na ... WAT4          | 2.38(10)            |
| C8 ... Cγ1@Val67     | 4.57(46)            |
| C8 ... Cδ@Leu61      | 6.4(6)              |
| C8 ... Cδ@Leu61      | 6.5(6)              |
| O4 ... N@Asn233      | 3.7(3)              |
| O5 ... Nζ@Lys224     | 4.6(5)              |
| N8-Oε1@Glu62         | 2.76(16)            |
| N7-Oε2@Glu62         | 2.72(16)            |

**Table 6SI.** IMI principal contacts. Distances are in Å, see also Figure 9SI.

| Zn-ligand distances | X-ray 1znb<br>(chain A/chain B) | MD      |
|---------------------|---------------------------------|---------|
| Zn1 ... His116      | 2.14/2.22                       | 2.17(3) |
| Zn1 ... His118      | 2.07/2.16                       | 2.09(3) |
| Zn1 ... His196      | 2.08.2.01                       | 2.07(4) |
| Zn1 ... OH          | 1.88/1.97                       | 1.96(2) |
| Zn2 ... OH          | 2.06/2.13                       | 2.06(2) |
| Zn2 ... Asp120      | 2.25/2.15                       | 2.21(3) |
| Zn2 ... Cys221      | 2.30/2.35                       | 2.31(3) |
| Zn2 ... His263      | 2.10/2.20                       | 2.12(4) |
| Zn2 ... WAT         | 2.27/2.18                       | 2.00(9) |

**Table 7SI. Zinc-ligand center.** Comparison of zinc-ligand distances between MD (average on all the trajectories) and X-ray structure. Distances are in Å.

## Solvation of the nucleophile and zinc center in CcrA and in BclI

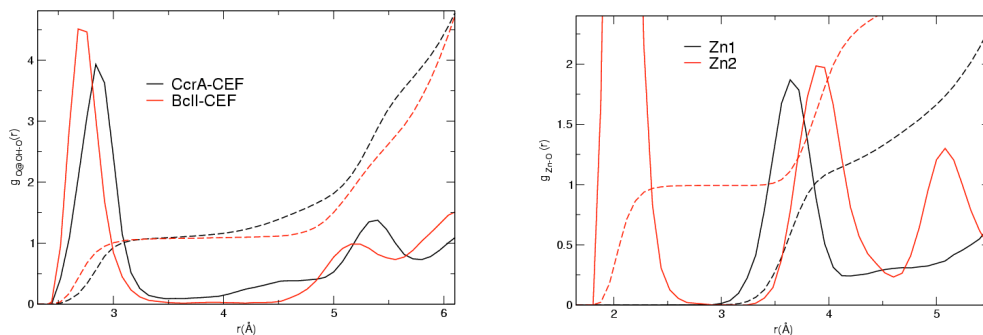

**Figure 10SI. CcrA-CEF RDFs.**  $g(r)$ 's of zinc ions Zn1 and Zn2 (right) and O@OH (left) with the oxygen atoms of solvent in CcrA-CEF;  $g(r)$  of OH is compared also with BclI-CEF MD model. The relative coordination numbers are reported in dashed lines and in ordinates axis.

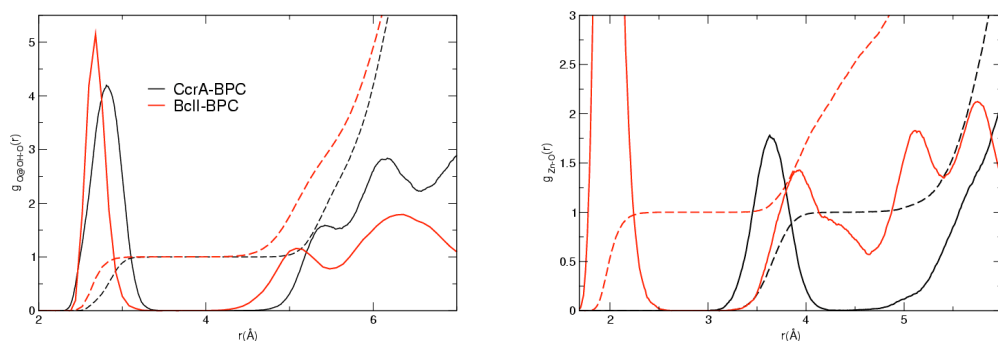

**Figure 11SI. CcrA-BPC RDFs.**  $g(r)$ 's of zinc ions Zn1 and Zn2 (right) and O@OH (left) with the oxygen atoms of solvent in CcrA-BPC;  $g(r)$  of OH is compared also with the BclI-BPC MD model. The relative coordination numbers are reported in dashed lines and in ordinates axis.

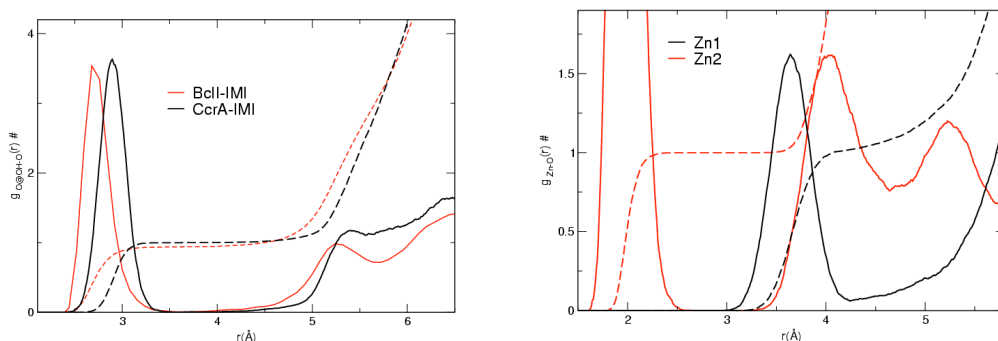

**Figure 12SI. CcrA-IMI RDFs.**  $g(r)$ 's of zinc ions Zn1 and Zn2 (right) and O@OH (left) with the oxygen atoms of solvent in CcrA-IMI;  $g(r)$  of OH is compared also with the same for BclI-IMI MD model. The relative coordination numbers are reported in dashed lines and in ordinates axis.
